# Supplementary material
Source: publisher figshare collection journal article supplement (https://gsapubs.figshare.com/ndownloader/files/34171779)
Supplement: Supplementary file 1 [file 34171779]

## Sheet: Table S5
Supplementary Table S5. U–Pb isotope compositions of titanite from the leucogranites and phengite gneisses, together with the results for U–Pb reference materials.
#	Spot No.	U (ppm)	Th (ppm)	Th/U	f207 (%)	Weighted residuals	207Pb-corrected 206Pb/238U Age (Ma)	± 2σ	238U/206Pb	± 2σ	207Pb/206Pb	± 2σ	206Pb/238U Age (Ma)	± 2σ	207Pb/206Pb Age (Ma)	± 2σ	Disc. (%)	Group
Leucogranite YK173-10a
1	YK173-10a - 22.d	299.544	25.5356	0.0852484	38.2666	2.44765	218.011	7.70377	19.5901	0.491601	0.334268	0.0148678	320.942	7.85666	3636.08	68.0909	91.1734	(M) P
2	YK173-10a - 18.d	316.857	62.0841	0.195937	9.17259	-3.99827	195.756	5.52901	28.8243	0.766265	0.146902	0.00801831	219.853	5.74603	2309.4	93.6934	90.4801	(I) P
3	YK173-10a - 31.d	272.596	62.7737	0.230281	15.3777	-3.2195	197.549	6.01918	26.855	0.717769	0.193084	0.0111002	235.684	6.18549	2767.87	94.3248	91.485	(I) P
4	YK173-10a - 15.d	248.848	58.752	0.236096	19.6991	-1.60266	202.394	6.55985	25.4832	0.647417	0.21313	0.0146119	248.13	6.1841	2928.77	110.883	91.5279	(I) P
5	YK173-10a - 24.d	182.445	68.8391	0.377315	27.6252	-2.44505	199.014	7.3721	22.9683	0.601647	0.293698	0.0167274	274.728	7.04521	3436.6	88.4394	92.0058	(I) P
6	YK173-10a - 2.d	121.595	30.9228	0.254311	34.3198	0.474744	210.664	8.94019	20.8424	0.646959	0.318048	0.0178103	302.103	9.16113	3559.73	86.1853	91.5133	(I) P
7	YK173-10a - 4.d	138.191	46.1372	0.333865	35.5437	0.0320302	208.844	10.5255	20.4548	0.565807	0.334415	0.0250497	307.693	8.31127	3636.75	114.666	91.5393	(I) P
8	YK173-10a - 10.d	120.693	8.1096	0.0671918	42.7584	-0.237167	203.866	46.0516	18.1657	1.50845	0.412545	0.108031	345.444	27.9303	3954.77	392.601	91.2651	(I) P
9	YK173-10a - 19.d	99.9933	53.8866	0.538902	45.5992	0.66163	220.307	32.7334	17.2632	1.12275	0.398397	0.0707346	363.005	22.9565	3902.36	267.063	90.6978	(I) P
10	YK173-10a - 13.d	87.9881	16.8738	0.191773	47.0589	-0.659012	202.774	21.3028	16.8011	0.880254	0.453246	0.0431193	372.706	18.9734	4095.23	141.42	90.899	(I) P
11	YK173-10a - 41.d	34.272	2.98831	0.0871938	70.9274	1.85546	259.395	48.6276	9.22488	0.495208	0.591328	0.0599488	663.464	33.8447	4486.18	147.467	85.2109	M
12	YK173-10a - 20.d	22.7162	7.58028	0.333694	90.02	0.0442018	252.549	719.996	3.16756	0.633858	0.810494	0.316987	1768.7	309.769	4939.65	556.581	64.1939	M
13	YK173-10a - 37.d	15.5457	1.14626	0.0737344	92.6975	-0.00543267	246.564	801.512	2.31799	0.410928	0.841931	0.258312	2312.07	344.756	4993.74	435.575	53.7007	M
14	YK173-10a - 26.d	9.85549	3.97058	0.40288	92.8655	1.07359	590.141	632.752	2.26061	0.425826	0.73394	0.202504	2361.19	372.83	4798	395.21	50.788	M
15	YK173-10a - 21.d	12.7807	3.47726	0.272071	93.0492	0.304882	383.49	865.602	2.20545	0.423843	0.803409	0.268441	2410.45	386.952	4927.15	475.765	51.0783	M
16	YK173-10a - 29.d	11.6881	3.03116	0.259338	93.4464	-0.210262	129.479	1190.69	2.08044	0.43998	0.8837	0.340677	2530.18	443.27	5062.38	545.68	50.02	M
17	YK173-10a - 7.d	6.68219	0.395573	0.0591981	94.4698	-0.361838	112.149	840.969	1.75546	0.329881	0.89363	0.202622	2906.39	440.317	5078.19	320.726	42.7671	M
18	YK173-10a - 27.d	7.46607	2.63819	0.353357	94.9264	-0.150088	189.203	1061.37	1.61061	0.256114	0.878735	0.236527	3113.43	393.148	5054.4	381.128	38.4016	M
19	YK173-10a - 34.d	2.28174	0.0282328	0.0123733	95.9458	-1.08658	86.2856	369.678	1.28662	0.0917906	0.905369	0.0650101	3707.06	201.194	5096.64	101.489	27.2647	M
20	YK173-10a - 40.d	1.66592	0.0730936	0.0438758	96.6814	-0.915133	11.209	647.728	1.05249	0.077622	0.918899	0.0925076	4305.52	231.734	5117.6	142.164	15.8684	M
21	YK173-10a - 1.d	1.9348	0.431539	0.223041	96.7696	0.305466	451.753	951.683	1.02262	0.138742	0.856325	0.137882	4396.61	433.06	5017.79	228.353	12.3796	M
22	YK173-10a - 30.d	7.03451	1.2263	0.174326	96.9419	0.281688	530.625	1545.26	0.970495	0.159208	0.848689	0.214088	4565.57	537.925	5005.09	357.949	8.7814	M
23	YK173-10a - 12.d	1.48126	0.0368553	0.024881	97.1315	-0.557578	176.124	514.289	0.910254	0.0655424	0.898543	0.0645875	4778.52	243.104	5085.94	101.642	6.04462	M
24	YK173-10a - 16.d	1.57294	0.0591788	0.0376231	97.1735	1.37262	664.765	497.855	0.896554	0.0635133	0.836868	0.0641516	4829.88	240.904	4985.17	108.87	3.11509	M
25	YK173-10a - 6.d	3.0436	0.287192	0.0943595	97.2623	0.716118	518.186	540.144	0.868962	0.0539086	0.857746	0.0668333	4936.92	214.059	5020.15	110.491	1.65789	M
26	YK173-10a - 11.d	1.60916	0.0618678	0.0384473	97.3807	-1.2185	65.3574	440.211	0.830527	0.0550741	0.91311	0.0497993	5094.59	233.628	5108.67	77.0446	0.275613	M
27	YK173-10a - 3.d	1.42958	0.122311	0.0855577	97.5791	-1.30279	-158.232	786.029	0.768563	0.0626909	0.936849	0.0803679	5372.44	297.53	5144.9	121.002	-4.42264	M
28	YK173-10a - 17.d	0.89462	0.0502762	0.0561983	97.9501	0.436487	547.067	835.838	0.65073	0.0555075	0.870818	0.0776804	6000.83	333.412	5041.58	126.378	-19.0267	M
29	YK173-10a - 32.d	113.053	35.1652	0.311051	51.1066	-1.36	193.835	24.1341	15.5171	0.63332	0.508174	0.049019	402.602	15.9294	4264.43	142.002	90.5591	I
30	YK173-10a - 38.d	51.8882	8.11503	0.156395	60.551	1.32007	236.507	38.1369	12.5181	0.874863	0.513719	0.0599817	495.433	33.3281	4280.4	171.73	88.4255	I
31	YK173-10a - 14.d	26.8695	2.11437	0.0786902	63.32	2.95548	249.193	25.5704	11.6389	0.516037	0.521736	0.0374344	531.356	22.6142	4303.17	105.396	87.652	I
32	YK173-10a - 33.d	56.9101	4.49447	0.0789749	64.0029	1.12182	226.166	24.3168	11.4233	0.47269	0.56572	0.0356252	540.975	21.4718	4421.67	91.912	87.7654	I
33	YK173-10a - 5.d	286.36	12.9252	0.0451362	65.1328	0.483808	231.462	76.6348	11.0645	0.881597	0.568717	0.114489	557.778	42.5748	4429.38	293.702	87.4073	I
34	YK173-10a - 25.d	39.63	31.2414	0.788326	70.9313	2.8331	262.732	34.797	9.22353	0.480972	0.587084	0.0411807	663.556	32.8809	4475.7	102.088	85.1743	I
35	YK173-10a - 36.d	29.8055	10.2376	0.343479	75.9738	1.5474	272.113	71.9881	7.62346	0.581757	0.634945	0.0734051	794.559	57.0475	4589.42	167.279	82.6872	I
36	YK173-10a - 23.d	20.8863	5.02284	0.240485	78.7311	1.93466	309.128	94.1372	6.74762	0.480571	0.632818	0.0865734	890.867	59.261	4584.57	197.999	80.5681	I
37	YK173-10a - 9.d	2.12709	0.0511716	0.024057	95.9326	0.271655	333.197	358.472	1.29115	0.094237	0.861093	0.0647576	3697.14	205.425	5025.67	106.618	26.4348	I
Leucogranite YK173-10b
38	YK173-10b - 25.d	298.256	73.4452	0.246248	53.8156	1.38084	225.161	19.8572	13.0261	0.382071	0.517761	0.033879	476.81	13.4808	4291.92	96.1783	88.8905	M
39	YK173-10b - 65.d	246.534	36.6298	0.148579	55.43	1.56374	226.165	18.4771	12.5706	0.345673	0.530087	0.0303629	493.438	13.0625	4326.47	84.032	88.5949	M
40	YK173-10b - 61.d	297.327	163.899	0.551243	60.2041	1.83879	227.483	16.099	11.2241	0.26262	0.569851	0.023621	550.178	12.339	4432.29	60.4655	87.5871	M
41	YK173-10b - 33.d	232.491	14.966	0.0643725	60.3266	1.39306	225.407	18.1368	11.1896	0.282859	0.574156	0.0267029	551.801	13.3685	4443.27	67.8029	87.5812	M
42	YK173-10b - 68.d	173.586	7.04948	0.0406109	65.7669	1.64925	239.615	30.8041	9.65459	0.287655	0.602594	0.0402095	635.341	18.0269	4513.61	96.9237	85.9239	M
43	YK173-10b - 63.d	261.866	287.691	1.09862	66.8023	0.727962	230.264	42.8302	9.36298	0.364023	0.624374	0.0544872	654.158	24.1853	4565.12	126.425	85.6705	M
44	YK173-10b - 50.d	240.781	24.0449	0.0998621	70.2118	2.10552	239.75	22.8121	8.40099	0.20072	0.643715	0.025698	724.999	16.3834	4609.26	57.7065	84.2708	M
45	YK173-10b - 39.d	195.196	265.419	1.35975	74.0802	0.742002	233.648	42.6595	7.3102	0.228082	0.685858	0.042651	826.514	24.203	4700.72	89.4874	82.4173	M
46	YK173-10b - 58.d	179.37	86.1914	0.480524	76.3955	0.668162	229.285	30.135	6.65733	0.159279	0.710852	0.0272723	902.142	20.1419	4752.17	55.0728	81.0162	M
47	YK173-10b - 7.d	82.4548	5.04383	0.0611708	77.4604	0.929985	244.49	52.8869	6.35652	0.260018	0.70688	0.0458856	941.859	35.8455	4744.12	93.2163	80.1468	M
48	YK173-10b - 69.d	236.709	215.999	0.912508	79.5537	1.19759	256.778	58.7373	5.76582	0.183337	0.716862	0.0466664	1031.01	30.2962	4764.25	93.393	78.3594	M
49	YK173-10b - 48.d	156.931	71.1273	0.453238	82.6976	0.220547	235.572	95.7074	4.87973	0.207376	0.762566	0.0645346	1201.75	46.594	4852.73	120.911	75.2357	M
50	YK173-10b - 60.d	139.037	208.457	1.49929	84.116	0.880351	252.463	58.2269	4.47932	0.119221	0.764992	0.0359615	1299.01	31.3137	4857.27	67.1491	73.2563	M
51	YK173-10b - 55.d	276.886	108.457	0.391702	84.127	0.444774	237.812	49.0599	4.47654	0.0973908	0.77422	0.030215	1299.75	25.6088	4874.39	55.7027	73.3352	M
52	YK173-10b - 21.d	170.992	45.8327	0.268039	85.5139	-0.202749	224.18	50.0411	4.08565	0.0906431	0.794737	0.0280702	1411.39	28.1221	4911.69	50.3275	71.2647	M
53	YK173-10b - 41.d	72.6102	50.4303	0.694534	86.8865	0.486523	247.356	63.9296	3.69809	0.096472	0.794745	0.0325896	1542.88	35.7952	4911.71	58.4296	68.5877	M
54	YK173-10b - 24.d	54.9332	4.7554	0.086567	87.675	0.18652	240.84	76.8714	3.47585	0.107493	0.805455	0.0368595	1630.02	44.5418	4930.77	65.1505	66.9419	M
55	YK173-10b - 20.d	107.891	30.0553	0.278571	93.0059	0.165025	273.699	206.966	1.97202	0.0647582	0.846196	0.0568243	2644.21	71.2305	5000.91	95.3062	47.1255	M
56	YK173-10b - 14.d	0.711352	0.155658	0.218821	93.4307	0.69267	379.949	346.614	1.85094	0.235047	0.823156	0.0895919	2784.56	287.329	4961.7	154.738	43.8789	M
57	YK173-10b - 44.d	22.1686	1.21115	0.0546336	96.3279	-0.0641986	291.886	393.017	1.03517	0.0428538	0.878865	0.0567615	4357.87	131.146	5054.61	91.4485	13.7843	M
58	YK173-10b - 13.d	31.144	1.98841	0.0638457	96.8273	0.123598	342.456	359.4	0.89405	0.0259053	0.878201	0.0449992	4839.4	98.625	5053.54	72.5564	4.23752	M
59	YK173-10b - 36.d	27.4719	4.67732	0.170258	97.0626	-0.131975	285.252	673.631	0.82805	0.0447102	0.887963	0.0778642	5105.12	190.461	5069.19	124.084	-0.708755	M
60	YK173-10b - 22.d	0.328272	0.0558261	0.17006	98.168	-0.41681	-101.799	2498.5	0.516961	0.0849871	0.927598	0.173147	6939.54	701.371	5130.9	263.446	-35.25	M
61	YK173-10b - 43.d	2.87212	0.357048	0.124315	98.1904	0.186544	542.738	1439.47	0.508819	0.0414904	0.881968	0.104726	7007.19	348.729	5059.6	168.095	-38.4928	M
62	YK173-10b - 47.d	2.91384	0.396214	0.135977	98.2833	0.265936	529.013	827.661	0.482762	0.0296166	0.884889	0.0569625	7233.76	266.868	5064.28	91.1095	-42.8389	M
63	YK173-10b - 40.d	0.777623	0.0729711	0.0938387	98.6707	2.09193	2172.65	1706.44	0.356505	0.0395324	0.808371	0.0837605	8614.46	528.146	4935.92	147.482	-74.5261	M
64	YK173-10b - 30.d	2.26989	0.579257	0.255192	99.3107	-0.437863	-553.376	6320.11	0.194272	0.0226947	0.934618	0.155755	11706.9	632.588	5141.54	235.098	-127.692	M
65	YK173-10b - 38.d	0.606893	0.248454	0.409386	99.5634	-0.0790786	830.804	5201.82	0.121764	0.0103739	0.906202	0.0925388	14314.7	490.544	5097.94	144.324	-180.794	M
66	YK173-10b - 16.d	0.2689	0.0155879	0.0579692	99.657	0.464977	0	17329.5	0.0744964	0.0111691	0.863209	0.174863	17204.6	905.393	5029.15	287.148	-242.097	M
67	YK173-10b - 66.d	0.250659	0.0553631	0.22087	99.8067	-0.203964	-668.655	29965	0.054549	0.00850514	0.925256	0.204321	19092.8	960.154	5127.33	311.711	-272.373	M
68	YK173-10b - 29.d	354.899	242.098	0.68216	53.826	2.80707	228.368	12.2458	13.0229	0.316494	0.512053	0.0197111	476.92	11.1722	4275.62	56.6326	88.8456	I
69	YK173-10b - 54.d	336.504	28.2196	0.0838611	58.4128	1.68147	224.746	14.7854	11.7294	0.263165	0.558525	0.0225716	527.417	11.3622	4402.98	59.0429	88.0214	I
70	YK173-10b - 64.d	198.134	13.3472	0.0673649	60.1505	1.15555	222.893	17.5044	11.2394	0.256207	0.57654	0.026075	549.457	12.0062	4449.3	65.9139	87.6507	I
71	YK173-10b - 3.d	319.104	23.8364	0.074698	60.5969	1.80055	227.394	16.2115	11.1133	0.243152	0.57345	0.0237445	555.432	11.6437	4441.47	60.3711	87.4944	I
72	YK173-10b - 28.d	214.668	78.2192	0.364373	61.7114	2.48258	232.364	15.6817	10.7987	0.259103	0.575812	0.0219208	570.917	13.1094	4447.46	55.4879	87.1631	I
73	YK173-10b - 51.d	267.78	234.554	0.875919	69.265	2.32341	244.638	25.2254	8.66782	0.21283	0.629027	0.0294738	703.856	16.3725	4575.87	67.8446	84.6181	I
74	YK173-10b - 45.d	282.576	29.4858	0.104346	72.8386	1.58009	237.828	26.3131	7.66023	0.178876	0.67017	0.0272861	790.971	17.382	4667.4	58.6851	83.0533	I
75	YK173-10b - 2.d	201.777	25.3077	0.125424	73.8681	0.420154	224.429	31.8483	7.37031	0.186947	0.693374	0.0319707	820.185	19.5349	4716.4	66.3014	82.6099	I
76	YK173-10b - 32.d	260.846	247.344	0.948238	74.0913	1.95481	245.643	28.6509	7.30667	0.171061	0.673776	0.0284333	826.89	18.1687	4675.13	60.8023	82.313	I
77	YK173-10b - 17.d	253.48	24.4406	0.0964204	74.6377	1.0301	233.864	30.6115	7.15295	0.164759	0.690691	0.0298502	843.545	18.2124	4710.83	62.1609	82.0935	I
78	YK173-10b - 34.d	212.89	227.371	1.06802	74.9443	1.63844	246.086	34.0763	7.06606	0.189401	0.681465	0.0327881	853.261	21.4222	4691.47	69.2683	81.8125	I
79	YK173-10b - 12.d	177.919	162.409	0.912824	77.5077	0.805092	233.129	32.6783	6.34354	0.154184	0.717344	0.028243	943.653	21.3365	4765.21	56.4818	80.1971	I
80	YK173-10b - 15.d	188.784	268.548	1.42251	79.3321	0.36434	239.781	100.347	5.82881	0.329072	0.728435	0.080609	1020.71	53.2959	4787.21	158.587	78.6784	I
81	YK173-10b - 70.d	157.72	59.4915	0.377198	80.8241	0.426293	231.791	46.078	5.6774	0.157507	0.739734	0.0358937	1045.84	26.7834	4809.26	69.4653	78.2537	I
82	YK173-10b - 57.d	116.635	100.216	0.859229	83.4837	0.240232	243.045	141.593	4.65787	0.292667	0.764903	0.0912272	1253.76	71.593	4857.11	170.365	74.1871	I
83	YK173-10b - 35.d	169.368	442.952	2.61533	85.5586	0.696388	248.852	56.5067	4.07256	0.0949662	0.781162	0.0317188	1415.46	29.6344	4887.13	57.9217	71.0369	I
84	YK173-10b - 42.d	216.941	115.983	0.53463	87.0711	-0.171253	226.358	69.7615	3.6464	0.0888133	0.807154	0.0350781	1562.3	33.7924	4933.77	61.863	68.3345	I
85	YK173-10b - 4.d	130.411	35.2106	0.269998	87.7741	0.0461378	235.419	64.0919	3.44799	0.0770621	0.808978	0.0304475	1641.65	32.3916	4936.98	53.5677	66.7479	I
86	YK173-10b - 56.d	166.683	22.9335	0.137587	87.8741	-0.233894	226.415	67.0249	3.41993	0.0782057	0.814167	0.0315758	1653.53	33.3525	4946.08	55.1763	66.5689	I
87	YK173-10b - 11.d	111.796	25.5733	0.22875	89.6947	-0.569358	211.917	97.7968	2.90662	0.0701569	0.835978	0.0392332	1906.09	39.8295	4983.66	66.6571	61.7533	I
88	YK173-10b - 59.d	40.2483	1.93387	0.0480486	89.8824	0.165997	259.307	229.429	2.85304	0.187573	0.81873	0.0909549	1937	110.007	4954.03	157.995	60.9005	I
89	YK173-10b - 27.d	277.063	683.691	2.46764	91.3251	0.224913	259.598	118.017	2.44617	0.0663092	0.833144	0.0400296	2209.45	50.7083	4978.84	68.2561	55.6233	I
90	YK173-10b - 6.d	48.0948	278.16	5.78358	93.094	1.92298	376.49	124.087	1.94587	0.049698	0.819113	0.0337783	2673.3	55.891	4954.7	58.6461	46.0452	I
91	YK173-10b - 49.d	77.5467	9.58503	0.123603	93.6335	0.413852	331.773	337.233	1.79443	0.108543	0.838295	0.0847589	2855.38	139.561	4987.6	143.582	42.7504	I
92	YK173-10b - 1.d	76.7782	16.9005	0.22012	93.64	0.00106955	262.016	174.892	1.79335	0.0575408	0.855852	0.043544	2856.77	74.0495	5017.01	72.1575	43.0584	I
93	YK173-10b - 10.d	81.2039	170.46	2.09916	93.8334	0.649417	323.859	185.243	1.73816	0.0536659	0.842804	0.0449763	2929.63	72.6921	4995.21	75.7573	41.3512	I
94	YK173-10b - 31.d	35.0231	229.353	6.54862	96.4898	-0.532359	225.582	316.117	0.989891	0.027795	0.889837	0.04331	4501.15	90.9698	5072.17	68.8644	11.258	I
95	YK173-10b - 46.d	23.4825	17.2834	0.736012	96.5474	-0.420334	245.053	315.201	0.97354	0.0326188	0.887706	0.0425444	4555.33	109.453	5068.78	67.8193	10.1297	I
96	YK173-10b - 67.d	31.9981	300.035	9.37665	97.1834	-0.79813	200.128	341.669	0.794365	0.0216989	0.898699	0.0374178	5252.95	98.1427	5086.19	58.8737	-3.27864	I
97	YK173-10b - 23.d	28.6292	310.736	10.8538	97.3319	-0.72927	216.479	348.686	0.752407	0.0213849	0.898144	0.0362169	5450.24	104.563	5085.32	57.0215	-7.17599	I
98	YK173-10b - 26.d	39.1622	212.85	5.43508	97.3475	-0.104333	267.727	1448.47	0.747807	0.0847642	0.892947	0.151073	5472.83	418.656	5077.11	239.324	-7.79421	I
99	YK173-10b - 18.d	26.5812	278.621	10.4819	97.8829	-1.12289	131.042	447.618	0.597201	0.0181866	0.909808	0.0365778	6341.69	122.925	5103.55	56.8073	-24.2602	I
Leucogranite YK1711-1a
100	YK1711-1a - 45.d	110.23	12.0328	0.109161	69.2556	-0.203535	213.116	17.7577	9.23964	0.238236	0.650283	0.0215102	662.456	16.2326	4623.93	47.7799	85.6733	M
101	YK1711-1a - 28.d	101.459	17.5271	0.172752	71.5295	-0.868397	206.35	21.9451	8.55648	0.248738	0.678293	0.0249121	712.526	19.6096	4684.76	52.8929	84.7906	M
102	YK1711-1a - 46.d	98.0176	10.654	0.108695	72.0996	-0.760672	207.301	23.1904	8.38509	0.224018	0.682039	0.026053	726.299	18.3508	4692.69	54.9903	84.5228	M
103	YK1711-1a - 31.d	98.8017	17.308	0.17518	72.5085	-1.1173	204.023	22.0371	8.26233	0.223785	0.689286	0.0242874	736.496	18.8507	4707.9	50.6871	84.3561	M
104	YK1711-1a - 12.d	105.517	9.67749	0.0917146	72.9445	-1.37361	200.27	23.6973	8.13142	0.22177	0.69718	0.0258402	747.692	19.2539	4724.27	53.2751	84.1734	M
105	YK1711-1a - 61.d	76.5595	12.5892	0.164437	74.7867	-0.77389	207.401	26.0066	7.57747	0.201606	0.704902	0.0265618	799.095	19.9958	4740.1	54.1219	83.1418	M
106	YK1711-1a - 36.d	191.208	71.6403	0.374672	75.5033	0.0794475	219.063	32.0481	7.36173	0.197636	0.699125	0.0320866	821.082	20.6971	4728.28	65.9567	82.6346	M
107	YK1711-1a - 59.d	92.0548	17.2145	0.187003	75.6099	-1.00763	204.874	25.9641	7.33014	0.195772	0.714508	0.0256378	824.404	20.6683	4759.53	51.4892	82.6789	M
108	YK1711-1a - 1.d	92.6656	20.0582	0.216458	75.9521	-2.13867	186.218	29.9058	7.22783	0.193519	0.736062	0.0293433	835.348	20.9773	4802.13	57.0905	82.6046	M
109	YK1711-1a - 39.d	89.3736	21.9885	0.246029	76.5118	-1.67551	194.889	28.2401	7.05935	0.182506	0.731886	0.0270082	854.02	20.6791	4793.98	52.8675	82.1856	M
110	YK1711-1a - 67.d	64.8221	5.00976	0.0772847	78.9154	-0.62195	208.842	36.4208	6.33656	0.172342	0.738942	0.0314793	944.619	23.8982	4807.73	60.9917	80.3521	M
111	YK1711-1a - 50.d	125.694	31.1226	0.247605	79.3394	-1.73244	185.666	40.3201	6.20971	0.173794	0.762516	0.0342165	962.543	25.0245	4852.64	64.1118	80.1645	M
112	YK1711-1a - 10.d	67.7737	14.9863	0.221122	81.3877	-0.586985	206.327	54.6348	5.59356	0.212931	0.762182	0.041829	1060.29	37.2181	4852.01	78.4121	78.1474	M
113	YK1711-1a - 58.d	82.3341	24.0413	0.291996	81.6473	0.207182	227.891	51.6488	5.515	0.170887	0.747895	0.0391017	1074.2	30.66	4824.96	74.7933	77.7366	M
114	YK1711-1a - 38.d	77.2048	19.0829	0.247173	81.8932	-1.23701	188.217	56.1645	5.44204	0.169623	0.780126	0.0419544	1087.45	31.1904	4885.24	76.7213	77.74	M
115	YK1711-1a - 22.d	54.7742	8.52837	0.155701	83.3529	-0.71224	199.374	70.8107	5.00304	0.220842	0.783718	0.0486114	1174.67	47.4028	4891.79	88.461	75.987	M
116	YK1711-1a - 69.d	219.006	91.9851	0.420012	88.8722	-1.39285	179.445	80.1622	3.34442	0.0951081	0.838292	0.0368339	1686.38	42.1978	4987.59	62.3971	66.1886	M
117	YK1711-1a - 53.d	34.171	6.8518	0.200515	89.8814	0.460882	299.044	264.748	3.03915	0.265763	0.79522	0.112045	1833.73	139.585	4912.56	200.756	62.6727	M
118	YK1711-1a - 54.d	10.3703	3.32697	0.320817	92.1065	0.274005	311.52	464.856	2.37047	0.254091	0.818641	0.154011	2268.9	205.083	4953.88	267.558	54.1994	M
119	YK1711-1a - 43.d	12.6274	2.20464	0.174592	92.6536	-0.61003	161.3	295.546	2.20796	0.144165	0.871762	0.0899431	2408.16	131.225	5043.12	146.16	52.2485	M
120	YK1711-1a - 55.d	13.4542	2.42263	0.180065	94.4439	-0.876787	-678.69	2292.46	1.66538	0.437199	1.0678	0.475102	3031.71	636.994	5328.75	622.928	43.1066	M
121	YK1711-1a - 47.d	22.0933	2.42018	0.109544	96.7932	-0.441597	148.893	745.083	0.963551	0.070476	0.90088	0.0988853	4589.1	240.239	5089.62	155.188	9.834	M
122	YK1711-1a - 48.d	1.64118	0.108343	0.0660155	97.687	-2.22649	-471.525	779.947	0.694895	0.0357615	0.963744	0.0693417	5747.72	195.797	5184.79	101.32	-10.8573	M
123	YK1711-1a - 68.d	1.89139	4.26026	2.25245	98.1897	-0.31586	176.556	1398.65	0.543555	0.0552789	0.907356	0.105028	6728.2	425.345	5099.74	163.582	-31.9322	M
124	YK1711-1a - 23.d	12.5525	6.02385	0.479892	98.2077	0.0556798	494.52	3473.27	0.536335	0.0967091	0.883579	0.265433	6784.18	760.098	5062.18	425.22	-34.0169	M
125	YK1711-1a - 66.d	283.234	144.705	0.510904	79.7934	-0.917623	207.507	29.2887	6.0727	0.140685	0.747627	0.0241402	982.685	21.1154	4824.45	46.1928	79.6312	I
126	YK1711-1a - 18.d	279.132	163.411	0.585425	80.9012	-0.639177	210.373	36.0837	5.73967	0.126993	0.754826	0.0283237	1035.35	21.1628	4838.15	53.647	78.6002	I
127	YK1711-1a - 4.d	258.95	156.587	0.604701	83.6259	-0.751488	204.752	53.7894	4.92088	0.117355	0.782296	0.0364058	1192.57	25.9652	4889.2	66.378	75.608	I
128	YK1711-1a - 11.d	258.626	123.914	0.479123	83.7307	-0.148086	221.902	42.1432	4.88899	0.106648	0.771555	0.0282497	1199.67	23.8788	4869.47	52.2713	75.3635	I
129	YK1711-1a - 20.d	275.151	123.155	0.44759	84.5234	-0.9484	204.45	45.9861	4.65112	0.105349	0.790067	0.0293219	1255.41	25.8379	4903.29	52.9024	74.3966	I
130	YK1711-1a - 7.d	231.255	152.894	0.661149	85.2261	-0.360652	216.524	59.3222	4.43969	0.106559	0.788559	0.0362749	1309.51	28.4435	4900.57	65.5802	73.2785	I
131	YK1711-1a - 60.d	126.198	60.3846	0.478492	85.3654	-0.0488271	226.064	54.7598	4.39762	0.111866	0.783982	0.0331201	1320.84	30.3808	4892.27	60.2489	73.0016	I
132	YK1711-1a - 34.d	250.597	103.236	0.411961	86.4278	-0.347048	200.653	165.167	4.07883	0.229553	0.808263	0.093097	1413.51	71.4363	4935.73	163.944	71.3617	I
133	YK1711-1a - 9.d	212.459	131.726	0.620009	87.3157	-1.01777	199.146	63.1296	3.81199	0.0847309	0.816402	0.0330907	1501.75	29.7775	4949.98	57.6551	69.6614	I
134	YK1711-1a - 30.d	243.331	146.388	0.601599	87.3669	-0.679719	201.44	87.8284	3.79656	0.112533	0.815616	0.0459868	1507.19	39.8368	4948.61	80.2066	69.5431	I
135	YK1711-1a - 21.d	238.127	143.421	0.602289	87.6277	-1.26522	195.591	57.6348	3.71825	0.078715	0.820793	0.0294093	1535.44	28.9241	4957.61	50.9494	69.0286	I
136	YK1711-1a - 65.d	242.023	126.79	0.523875	88.0717	0.124026	236.896	66.4737	3.5841	0.0816645	0.803839	0.0328639	1586.37	32.042	4927.91	58.2123	67.8084	I
137	YK1711-1a - 51.d	228.98	108.682	0.474637	88.4189	-0.546039	214.965	68.9662	3.48014	0.0781147	0.817829	0.0330562	1628.25	32.2973	4952.47	57.4883	67.1225	I
138	YK1711-1a - 8.d	206.712	131.153	0.634471	88.796	-1.00619	199.043	71.353	3.36706	0.0760122	0.8286	0.0330447	1676.39	33.3246	4971.07	56.6743	66.2771	I
139	YK1711-1a - 33.d	182.496	75.1197	0.411624	90.0642	-0.809775	203.513	87.354	2.9858	0.0823174	0.837156	0.0359146	1862.18	44.5904	4985.66	60.9275	62.6493	I
140	YK1711-1a - 41.d	183.791	96.4478	0.524769	90.2892	-0.85851	197.307	98.7961	2.91827	0.0709365	0.841551	0.0397424	1899.5	39.9921	4993.1	67.0472	61.9576	I
141	YK1711-1a - 35.d	216.541	66.6976	0.308014	90.3408	-0.797259	202.999	92.5389	2.90269	0.0675332	0.839683	0.0370224	1908.32	38.4304	4989.94	62.6061	61.7567	I
142	YK1711-1a - 56.d	190.323	113.812	0.597996	90.4169	-0.919302	201.153	85.011	2.87982	0.0662197	0.841056	0.0336982	1921.42	38.2061	4992.26	56.8859	61.512	I
143	YK1711-1a - 14.d	183.189	139.332	0.76059	90.8548	-1.43666	179.727	86.9999	2.74848	0.0666851	0.852833	0.0328327	2000.33	41.7257	5012	54.6123	60.0891	I
144	YK1711-1a - 6.d	191.363	117.56	0.614332	90.9982	-0.723988	204.721	104.406	2.70506	0.0732091	0.84454	0.038944	2027.88	47.089	4998.13	65.4533	59.4272	I
145	YK1711-1a - 24.d	167.992	65.6639	0.390874	91.4538	-1.3588	178.258	98.1061	2.56845	0.0576042	0.857787	0.0346265	2119.77	40.5161	5020.21	57.2429	57.7754	I
146	YK1711-1a - 15.d	151.342	58.0905	0.383835	93.9269	-0.984492	192.529	140.168	1.82493	0.0392422	0.872337	0.0352162	2816.71	49.071	5044.05	57.1875	44.1579	I
147	YK1711-1a - 32.d	144.921	52.5252	0.36244	94.0319	-0.894933	180.133	184.131	1.79345	0.0516124	0.876245	0.0455047	2856.64	66.4135	5050.38	73.5453	43.4372	I
148	YK1711-1a - 64.d	131.954	142.614	1.08078	94.1648	-1.09995	182.352	148.471	1.75351	0.0393006	0.876692	0.0358111	2908.99	52.4726	5051.11	57.847	42.4088	I
149	YK1711-1a - 17.d	106.137	44.0942	0.415446	94.7634	-0.849208	148.849	287.682	1.57379	0.06553	0.888464	0.0622862	3170.94	104.298	5069.99	99.1997	37.4567	I
150	YK1711-1a - 49.d	114.048	59.1417	0.518569	95.107	-0.986224	198.007	157.222	1.47015	0.0325803	0.880585	0.031798	3345.14	57.8363	5057.38	51.1236	33.8563	I
151	YK1711-1a - 25.d	116.608	75.6865	0.649069	95.5783	-0.678194	201.511	239.996	1.32848	0.0369428	0.883786	0.0440236	3617.61	76.9913	5062.52	70.5075	28.5414	I
152	YK1711-1a - 19.d	118.97	53.13	0.446584	96.3214	-0.291233	179.351	820.759	1.10525	0.0956728	0.893347	0.125374	4153.83	265.209	5077.74	198.519	18.1953	I
153	YK1711-1a - 52.d	99.6249	49.1098	0.492947	96.3876	-0.905198	188.398	248.863	1.08529	0.0237625	0.892478	0.0371908	4209.89	67.6881	5076.36	58.9491	17.0687	I
154	YK1711-1a - 42.d	112.253	65.9927	0.587893	96.5772	-0.387992	197.927	556.306	1.02824	0.050659	0.892594	0.0791568	4379.19	156.621	5076.55	125.45	13.7369	I
155	YK1711-1a - 29.d	120.062	71.7602	0.597692	96.7784	-0.777226	196.582	298.665	0.96775	0.0213182	0.894416	0.0398598	4574.84	72.1694	5079.43	63.0344	9.934	I
156	YK1711-1a - 57.d	94.3756	69.9176	0.740844	97.1669	-0.926968	172.934	334.751	0.851084	0.0210427	0.900346	0.039186	5008.97	86.1085	5088.78	61.5363	1.56836	I
157	YK1711-1a - 5.d	79.6967	66.9294	0.839802	97.4132	-1.1905	153.174	315.043	0.777145	0.0173054	0.904217	0.0335471	5332.06	80.7788	5094.84	52.442	-4.65612	I
158	YK1711-1a - 16.d	67.3961	84.9788	1.26089	98.2275	-0.738307	94.1431	840.099	0.532493	0.0207189	0.913665	0.0611874	6814.39	163.707	5109.53	94.6022	-33.3662	I
159	YK1711-1a - 27.d	66.5982	47.8889	0.719072	98.3842	-1.52964	22.2875	530.896	0.485524	0.0109219	0.91903	0.0348343	7208.98	97.6243	5117.8	53.5245	-40.861	I
160	YK1711-1a - 40.d	72.6624	49.4395	0.6804	98.4944	-0.865361	106.674	769.76	0.452164	0.0112069	0.913919	0.0476091	7521.46	110.036	5109.92	73.5872	-47.1931	I
161	YK1711-1a - 37.d	48.0273	48.1446	1.00244	98.8591	-0.357752	329.479	1000.44	0.341618	0.010049	0.90496	0.0478275	8818.3	141.365	5096	74.7006	-73.0434	I
162	YK1711-1a - 44.d	35.4194	82.4676	2.32832	99.3371	-1.35145	-1093.64	3012.6	0.198953	0.0091955	0.948125	0.0706456	11578.6	248.631	5161.77	105.025	-124.315	I
163	YK1711-1a - 2.d	40.3193	87.5019	2.17022	99.4104	-1.00262	-338.175	2379.19	0.177126	0.00707758	0.928469	0.0547991	12209.3	218.91	5132.22	83.2947	-137.895	I
164	YK1711-1a - 3.d	37.7984	89.8325	2.37662	99.4542	-0.943631	-807.783	3822.35	0.164101	0.00925821	0.937637	0.0768863	12630	312.668	5146.09	115.657	-145.428	I
Phengite gneiss YK1711-1b
165	YK1711-1b - 71.d	312.265	84.7383	0.271367	52.8269	0.970149	216.926	12.2542	13.9684	0.316354	0.504599	0.0217223	445.728	9.75366	4254.04	63.4094	89.5222	M
166	YK1711-1b - 4.d	278.628	120.184	0.431341	57.9053	-0.0261239	211.784	14.0217	12.4649	0.301361	0.558264	0.0225006	497.469	11.5749	4402.3	58.8869	88.6998	M
167	YK1711-1b - 68.d	267.207	164.488	0.61558	62.0012	-0.421381	209.383	16.6851	11.2521	0.28341	0.597257	0.0246174	548.866	13.2523	4500.69	59.9097	87.8048	M
168	YK1711-1b - 53.d	153.835	28.0917	0.18261	67.2398	0.358062	219.531	29.0552	9.7003	0.330517	0.628171	0.0377619	632.489	20.5273	4573.9	87.0497	86.1718	M
169	YK1711-1b - 64.d	239.394	152.837	0.638434	70.1103	-0.379582	211.295	21.7963	8.85058	0.206339	0.663897	0.0259441	690.071	15.2569	4653.84	56.3637	85.172	M
170	YK1711-1b - 25.d	97.5931	19.1918	0.196651	72.3715	-1.09345	179.456	67.5302	8.18205	0.408409	0.719367	0.0756917	743.322	35.0442	4769.25	150.918	84.4143	M
171	YK1711-1b - 1.d	220.387	236.299	1.0722	74.2307	-0.548583	209.105	30.0249	7.63049	0.185853	0.70159	0.0311948	793.871	18.1929	4733.33	63.8827	83.2281	M
172	YK1711-1b - 70.d	109.815	18.8951	0.172063	74.7977	-0.48404	202.654	61.882	7.46278	0.333986	0.713076	0.0632739	810.635	34.0907	4756.65	127.348	82.9579	M
173	YK1711-1b - 39.d	78.9057	6.37447	0.0807859	75.3505	-0.783645	207.274	27.3649	7.29894	0.196913	0.712955	0.0269672	827.711	20.9562	4756.41	54.2852	82.598	M
174	YK1711-1b - 15.d	93.7567	15.1444	0.161529	76.1712	-0.878869	201.372	38.9282	7.05608	0.225564	0.725634	0.0374382	854.391	25.5801	4781.69	73.9578	82.132	M
175	YK1711-1b - 55.d	57.9067	4.10762	0.0709351	76.8656	-0.567951	209.647	32.6483	6.85019	0.192139	0.723461	0.0303805	878.398	23.0332	4777.39	60.2081	81.6134	M
176	YK1711-1b - 45.d	71.5353	5.69848	0.0796597	76.8689	-1.79654	190.196	32.0627	6.84976	0.1931	0.741938	0.0298264	878.449	23.1511	4813.52	57.5403	81.7504	M
177	YK1711-1b - 6.d	84.4771	6.03997	0.0714983	77.3708	-2.73164	183.971	25.9628	6.70129	0.176312	0.751582	0.0234491	896.617	22.0232	4832	44.6185	81.4442	M
178	YK1711-1b - 29.d	195.074	185.704	0.951964	79.0213	-0.837759	205.816	35.1167	6.21191	0.147116	0.74512	0.0298017	962.226	21.1692	4819.64	57.2308	80.0353	M
179	YK1711-1b - 14.d	111.44	9.59626	0.0861116	80.0178	-1.33628	198.431	34.4328	5.91701	0.139554	0.759504	0.027794	1006.62	21.9806	4846.98	52.2982	79.232	M
180	YK1711-1b - 21.d	43.5125	2.67869	0.0615614	81.6075	-3.35585	138.605	50.3084	5.44742	0.201198	0.817299	0.0373874	1086.46	36.9291	4951.55	65.0654	78.0581	M
181	YK1711-1b - 54.d	128.846	95.2487	0.739245	81.9963	-0.704652	203.41	56.4576	5.33094	0.133102	0.771771	0.041435	1108.27	25.4233	4869.87	76.6456	77.2422	M
182	YK1711-1b - 57.d	56.6843	4.98308	0.0879093	82.4292	-1.00197	198.254	51.042	5.20288	0.195659	0.779062	0.036265	1133.29	39.0829	4883.29	66.4136	76.7925	M
183	YK1711-1b - 11.d	41.3744	2.33853	0.0565212	82.562	-1.59411	183.76	50.5253	5.16386	0.188783	0.790486	0.0356299	1141.14	38.2348	4904.05	64.2469	76.7307	M
184	YK1711-1b - 47.d	73.8487	7.48512	0.101358	83.8655	-0.552102	212.83	46.2176	4.7772	0.120586	0.780978	0.0302601	1225.24	28.1661	4886.79	55.2718	74.9276	M
185	YK1711-1b - 30.d	63.8561	11.9665	0.187399	85.4677	-0.214131	195.699	301.389	4.30306	0.535754	0.805047	0.17905	1347.03	151.377	4930.05	316.647	72.6772	M
186	YK1711-1b - 18.d	42.4879	15.7737	0.371252	88.2341	-0.485336	171.321	257.557	3.48416	0.294639	0.838769	0.123755	1626.59	121.585	4988.4	209.515	67.3926	M
187	YK1711-1b - 63.d	104.691	271.971	2.59786	91.5066	-0.198539	230.232	151.511	2.51414	0.103044	0.840996	0.0527359	2158.67	75.1886	4992.16	89.0303	56.7587	M
188	YK1711-1b - 44.d	14.4899	0.970975	0.0670106	93.0065	-0.389524	220.299	174.544	2.07011	0.0969904	0.857894	0.0499638	2540.61	98.386	5020.39	82.5867	49.3942	M
189	YK1711-1b - 8.d	344.251	225.382	0.6547	61.1269	0.462522	216.684	17.5346	11.5106	0.275302	0.578168	0.0266927	537.038	12.324	4453.41	67.2707	87.941	I
190	YK1711-1b - 40.d	263.548	176.915	0.671282	69.9396	-1.12782	203.373	21.3423	8.90144	0.20631	0.672203	0.0255502	686.331	15.0897	4671.76	54.7737	85.3089	I
191	YK1711-1b - 59.d	229.219	192.781	0.841032	75.2581	0.429606	223.947	28.5135	7.32573	0.169652	0.695239	0.0284008	824.87	17.931	4720.26	58.7293	82.5249	I
192	YK1711-1b - 61.d	184.13	199.787	1.08503	78.0799	-0.477656	211.767	33.4669	6.49053	0.144429	0.731897	0.0296904	923.742	19.1505	4794.01	58.1168	80.7313	I
193	YK1711-1b - 65.d	289.049	212.87	0.73645	81.6872	-0.217465	217.522	49.6036	5.42215	0.127669	0.75861	0.0370112	1091.12	23.635	4845.3	69.7289	77.4808	I
194	YK1711-1b - 62.d	218.801	192.404	0.879357	82.6962	-0.212612	205.203	177.224	5.12364	0.398465	0.776281	0.125369	1149.34	81.8735	4878.19	230.471	76.4392	I
195	YK1711-1b - 16.d	246.564	208.32	0.844893	87.6639	-0.420194	214.33	85.6711	3.65233	0.105721	0.813071	0.0431821	1560.05	40.1093	4944.17	75.5656	68.4466	I
196	YK1711-1b - 27.d	160.186	191.244	1.19389	91.8546	-0.412543	199.868	229.253	2.41149	0.119384	0.854406	0.0764628	2236.29	93.5546	5014.61	126.936	55.4045	I
197	YK1711-1b - 17.d	124.776	251.423	2.015	93.1954	-0.811923	205.026	125.421	2.01436	0.0449295	0.86385	0.0348189	2598.46	47.7009	5030.2	57.132	48.3427	I
198	YK1711-1b - 67.d	81.7664	135.695	1.65955	94.1983	0.0630072	276.532	381.345	1.71654	0.117232	0.855144	0.0912459	2959.21	162.101	5015.84	151.338	41.0026	I
199	YK1711-1b - 51.d	118.779	222.105	1.8699	95.211	-0.501294	179.956	390.904	1.41759	0.077611	0.885554	0.0765243	3441.17	146.009	5065.34	122.301	32.0644	I
200	YK1711-1b - 26.d	71.4348	42.2297	0.591164	96.081	-0.864509	139.513	360.165	1.16017	0.0438168	0.898376	0.0574139	4007.23	112.719	5085.68	90.3703	21.2056	I
201	YK1711-1b - 38.d	106.466	63.4808	0.596254	96.1079	-0.604036	223.806	235.44	1.1516	0.0283727	0.885112	0.0374719	4029.39	73.8199	5064.64	59.9191	20.4408	I
202	YK1711-1b - 50.d	91.0963	244.943	2.68883	96.1973	-0.0169718	291.528	584.38	1.12455	0.0667641	0.875326	0.0918077	4101.06	180.189	5048.9	148.546	18.7731	I
203	YK1711-1b - 37.d	50.2707	111.469	2.21739	96.386	-0.470691	200.025	433.064	1.06942	0.0444014	0.891166	0.0640629	4255.61	129.353	5074.28	101.701	16.1338	I
204	YK1711-1b - 20.d	108.984	188.208	1.72694	96.4026	-1.00876	153.36	297.403	1.06481	0.029048	0.898162	0.0435059	4269.1	85.1747	5085.34	68.4961	16.0509	I
205	YK1711-1b - 34.d	36.0914	84.3029	2.33581	96.6422	-0.165631	251.209	696.931	0.993155	0.0688649	0.886194	0.0963263	4490.49	224.354	5066.37	153.83	11.3667	I
206	YK1711-1b - 7.d	50.1811	80.2128	1.59846	96.715	-0.447229	210.355	453.248	0.971893	0.0442883	0.892449	0.0609851	4560.86	148.999	5076.32	96.6675	10.1541	I
207	YK1711-1b - 46.d	39.6445	94.6561	2.38762	96.8504	-0.209994	283.471	308.532	0.931226	0.0324052	0.884141	0.0399619	4702.07	116.169	5063.08	63.9751	7.1304	I
208	YK1711-1b - 31.d	61.8146	188.88	3.05558	97.0464	-0.689451	196.794	369.754	0.873804	0.0244181	0.896923	0.0445967	4917.77	96.1444	5083.39	70.3164	3.25802	I
209	YK1711-1b - 56.d	96.6352	71.4193	0.73906	97.0516	-0.97268	177.722	302.956	0.872399	0.0197409	0.899264	0.036343	4923.31	77.9098	5087.08	57.1445	3.21921	I
210	YK1711-1b - 9.d	78.169	189.902	2.42938	97.0726	-0.458033	260.858	278.848	0.865606	0.0187123	0.889436	0.0334419	4950.27	74.7007	5071.53	53.1993	2.39099	I
211	YK1711-1b - 3.d	86.151	76.2902	0.885541	97.1147	-1.26426	126.788	319.651	0.853978	0.019789	0.90571	0.0373451	4997.15	80.5774	5097.18	58.2771	1.96227	I
212	YK1711-1b - 5.d	19.2193	83.3756	4.33812	97.3055	-0.146432	300.292	469.813	0.796321	0.0310206	0.887535	0.0522254	5244.12	139.818	5068.51	83.2686	-3.46476	I
213	YK1711-1b - 23.d	50.6483	96.811	1.91144	97.3233	-1.40425	98.25	343.471	0.792295	0.0205121	0.909884	0.0371123	5262.33	93.1243	5103.67	57.6324	-3.10868	I
214	YK1711-1b - 48.d	67.9733	57.645	0.848053	97.355	-0.602969	128.227	700.151	0.782763	0.0377947	0.906789	0.0752858	5305.98	174.635	5098.86	117.336	-4.0621	I
215	YK1711-1b - 52.d	53.3342	75.7987	1.4212	97.384	-0.544646	169.671	625.56	0.773962	0.0344785	0.902521	0.0667751	5346.96	161.917	5092.19	104.593	-5.00327	I
216	YK1711-1b - 41.d	83.2762	54.0079	0.64854	97.4684	-0.504321	95.6292	993.154	0.749294	0.0510293	0.910729	0.101931	5465.5	251.098	5104.98	158.135	-7.06213	I
217	YK1711-1b - 69.d	34.0336	90.1342	2.64839	97.621	-0.111633	287.362	1158.88	0.70299	0.0491039	0.89267	0.113828	5703.78	264.555	5076.67	180.382	-12.3527	I
218	YK1711-1b - 42.d	25.2532	119.153	4.71833	97.8982	-1.14056	78.2209	523.162	0.621992	0.0171817	0.913872	0.0443518	6178.78	109.797	5109.85	68.5562	-20.9189	I
219	YK1711-1b - 2.d	74.0879	39.4451	0.53241	97.97	-0.576129	86.7998	1023.21	0.600657	0.0344764	0.913394	0.0840757	6318.43	231.261	5109.11	130.031	-23.6698	I
220	YK1711-1b - 58.d	18.203	14.8654	0.816645	97.9805	-1.54379	37.3676	451.363	0.597738	0.0168843	0.917464	0.0365425	6338.06	113.981	5115.39	56.2508	-23.9017	I
221	YK1711-1b - 19.d	51.0125	214.041	4.19586	98.1753	-0.284353	218.398	1264.29	0.539198	0.0329151	0.904336	0.0945732	6761.86	255.799	5095.03	147.82	-32.7149	I
222	YK1711-1b - 33.d	61.5149	61.3358	0.997089	98.451	-0.880536	86.7742	796.382	0.45806	0.016229	0.915082	0.049805	7464.06	156.674	5111.72	76.8774	-46.0185	I
223	YK1711-1b - 32.d	64.4473	62.2365	0.965695	98.4605	-0.657526	169.855	809.561	0.454886	0.0165262	0.909922	0.0507302	7494.83	161.008	5103.73	78.7763	-46.85	I
224	YK1711-1b - 13.d	76.9347	58.0616	0.754688	98.4954	-0.677674	28.4889	1232.58	0.445086	0.0212043	0.918777	0.0745498	7591.66	212.6	5117.41	114.582	-48.3497	I
225	YK1711-1b - 43.d	47.5141	281.183	5.91789	98.7477	-0.523335	271.378	824.397	0.369237	0.0082515	0.906707	0.0423181	8448.48	105.222	5098.73	65.9605	-65.6978	I
226	YK1711-1b - 22.d	28.051	82.4305	2.93859	98.8109	-1.31539	-196.693	1099.98	0.352024	0.0128056	0.929788	0.051198	8674.67	173.486	5134.23	77.704	-68.9577	I
227	YK1711-1b - 36.d	57.7018	49.9746	0.866084	99.1233	-0.93141	-65.876	1487.99	0.258955	0.00936174	0.922805	0.0517334	10194.3	185.166	5123.59	79.1462	-98.9672	I
228	YK1711-1b - 60.d	55.6066	70.5459	1.26866	99.1572	-0.424644	106.908	2471.97	0.248324	0.0151113	0.916878	0.0841553	10409.8	314.499	5114.49	129.63	-103.536	I
229	YK1711-1b - 28.d	47.6813	42.1687	0.884387	99.1794	-1.42772	-158.491	1155.4	0.242474	0.00517853	0.925666	0.0371129	10533.2	110.819	5127.96	56.5925	-105.407	I
230	YK1711-1b - 35.d	56.9643	46.2453	0.81183	99.2078	-1.03374	-78.5546	1455.54	0.233848	0.00576544	0.922981	0.0455958	10721.8	128.829	5123.86	69.7422	-109.253	I
231	YK1711-1b - 12.d	43.77	59.6548	1.36291	99.3322	-0.595052	-216.223	3324.52	0.19714	0.0134199	0.926211	0.0866238	11627.9	366.959	5128.79	132.008	-126.718	I
232	YK1711-1b - 10.d	39.4218	54.0301	1.37056	99.4123	-1.74117	-1344.42	2824.2	0.173967	0.00599231	0.949718	0.0558618	12308	189.198	5164.14	82.8996	-138.336	I
Leucogranite YK192-1a
233	YK192-1a - 16.d	553.747	117.575	0.212326	45.8668	1.99102	222.167	12.7869	17.1608	0.453848	0.397059	0.0271112	365.11	9.38765	3897.3	102.738	90.6317	(M) P
234	YK192-1a - 17.d	482.994	114.377	0.236808	11.5948	-1.24137	203.931	5.42405	28.0264	0.708424	0.136564	0.00717042	226.004	5.61373	2183.29	91.3613	89.6485	(I) P
235	YK192-1a - 34.d	264.79	58.314	0.220228	11.6111	-3.94944	194.263	6.36977	28.0222	0.807091	0.174225	0.0122033	226.037	6.39748	2597.9	116.776	91.2992	(I) P
236	YK192-1a - 43.d	290.237	64.4079	0.221915	13.627	-1.32129	202.541	7.29896	27.3823	0.840819	0.159854	0.0148947	231.226	6.97433	2453.35	157.58	90.5751	(I) P
237	YK192-1a - 23.d	238.921	52.1161	0.218131	14.2456	-2.67736	199.243	5.99795	27.1865	0.737012	0.17772	0.010239	232.861	6.20009	2630.96	95.7473	91.1492	(I) P
238	YK192-1a - 1.d	231.514	68.0047	0.293739	18.8342	-2.00998	200.978	6.55775	25.7317	0.71861	0.211281	0.0124179	245.779	6.73466	2914.67	95.1758	91.5675	(I) P
239	YK192-1a - 20.d	446.223	79.954	0.179179	19.5434	-1.16655	204.289	5.80075	25.5066	0.630558	0.20578	0.0104005	247.907	6.01225	2871.86	82.1537	91.3677	(I) P
240	YK192-1a - 3.d	149.187	33.555	0.224919	25.3323	-4.21146	193.254	6.79135	23.6724	0.64089	0.293374	0.0143628	266.723	7.07372	3434.88	76.0311	92.2349	(I) P
241	YK192-1a - 45.d	453.826	119.791	0.263958	26.5014	0.532839	210.365	8.84498	23.3004	0.726241	0.247966	0.0194256	270.893	8.26845	3171.11	124.16	91.4575	(I) P
242	YK192-1a - 52.d	138.881	16.6633	0.119982	29.6497	0.0838554	208.629	9.13068	22.3025	0.714934	0.282137	0.019444	282.752	8.86806	3374.1	107.514	91.6199	(I) P
243	YK192-1a - 40.d	279.478	14.1978	0.050801	30.1851	-2.94786	197.291	7.37003	22.1337	0.555238	0.321759	0.0168447	284.862	6.99036	3577.57	80.4714	92.0376	(I) P
244	YK192-1a - 55.d	150.422	56.6713	0.376749	32.3537	-1.14051	202.864	9.77702	21.4458	0.649919	0.323806	0.0227251	293.794	8.70366	3587.32	107.803	91.8102	(I) P
245	YK192-1a - 42.d	124.479	20.832	0.167354	33.0548	-3.88761	190.907	8.81311	21.2244	0.643712	0.365126	0.0196232	296.789	8.79721	3770.63	81.5305	92.1289	(I) P
246	YK192-1a - 12.d	241.833	50.8574	0.2103	36.0002	-0.106843	208.333	7.32936	20.2894	0.554849	0.340591	0.0131261	310.141	8.28056	3664.73	58.8824	91.5371	(I) P
247	YK192-1a - 5.d	241.937	56.3102	0.232747	36.1082	-0.318326	206.642	13.1623	20.2553	0.66533	0.346316	0.0317748	310.651	9.96207	3690.18	139.939	91.5817	(I) P
248	YK192-1a - 38.d	203.383	40.7375	0.2003	37.2042	-0.0152284	208.732	11.3587	19.9077	0.598884	0.350399	0.0262286	315.945	9.27542	3708.05	114.03	91.4795	(I) P
249	YK192-1a - 27.d	85.323	22.7298	0.266397	37.7387	-1.33755	197.2	17.3413	19.7391	0.795744	0.386787	0.0422377	318.578	12.5307	3857.81	164.725	91.742	(I) P
250	YK192-1a - 65.d	348.104	73.1042	0.210007	38.5651	2.06055	218.209	9.31513	19.4756	0.58952	0.337159	0.0179189	322.782	9.52992	3649.25	81.2868	91.1549	(I) P
251	YK192-1a - 44.d	102.166	24.9978	0.244678	39.0937	-2.38859	197.281	9.67724	19.3095	0.646367	0.398184	0.0190309	325.489	10.6249	3901.56	71.8946	91.6575	(I) P
252	YK192-1a - 19.d	576.89	124.961	0.216611	39.2927	2.2856	219.513	9.43245	19.2449	0.481843	0.340583	0.0205656	326.555	7.97248	3664.7	92.2575	91.0892	(I) P
253	YK192-1a - 49.d	627.852	151.659	0.241552	40.4788	0.422595	210.687	7.60235	18.8695	0.447585	0.375013	0.0150531	332.886	7.69567	3811.11	60.7323	91.2654	(I) P
254	YK192-1a - 64.d	95.9319	36.3436	0.378848	40.8714	0.854743	215.67	15.5422	18.7447	0.762162	0.365657	0.033534	335.046	13.2751	3772.84	139.104	91.1195	(I) P
255	YK192-1a - 6.d	255.715	45.8735	0.179393	42.711	0.599107	211.833	8.52719	18.1618	0.462806	0.392581	0.0166876	345.516	8.57275	3880.23	64.0283	91.0955	(I) P
256	YK192-1a - 67.d	173.415	31.2048	0.179944	42.8432	0.52312	217.096	29.9505	18.1196	1.01691	0.380575	0.0689661	346.3	18.9224	3833.37	273.784	90.9662	(I) P
257	YK192-1a - 18.d	463.69	104.507	0.22538	43.3236	0.303752	211.631	14.9011	17.9677	0.578507	0.39873	0.0330981	349.15	10.9426	3903.62	124.85	91.0557	(I) P
258	YK192-1a - 39.d	78.8773	21.5992	0.273833	44.5269	0.0676107	210.856	39.9061	17.5863	1.25271	0.411696	0.0903603	356.516	24.7062	3951.68	329.123	90.9781	(I) P
259	YK192-1a - 53.d	579.977	150.515	0.25952	46.2159	1.28341	215.047	8.50355	17.0506	0.388449	0.417279	0.0164588	367.404	8.13619	3971.86	59.0726	90.7498	(I) P
260	YK192-1a - 69.d	67.3483	16.9363	0.251474	57.1482	-0.588293	194.596	56.5526	13.586	1.07659	0.558054	0.102449	457.838	35.022	4401.75	268.231	89.5987	M
261	YK192-1a - 25.d	457.333	139.622	0.305295	58.0503	3.96196	232.272	10.845	13.2983	0.295027	0.496198	0.017594	467.393	10.0023	4229.29	52.3011	88.9487	M
262	YK192-1a - 31.d	102.406	17.8517	0.174323	67.897	0.505593	227.432	53.9741	10.1774	0.557123	0.602624	0.074293	604.188	31.5717	4513.68	179.071	86.6143	M
263	YK192-1a - 22.d	49.7874	6.49994	0.130554	73.9711	-0.155246	213.774	32.2213	8.25237	0.31511	0.678402	0.035616	737.336	26.6042	4684.99	75.6061	84.2617	M
264	YK192-1a - 28.d	30.0048	1.61183	0.053719	86.5517	-0.370515	212.968	82.1955	4.26424	0.201209	0.795878	0.0481684	1358.08	57.7828	4913.74	86.23	72.3615	M
265	YK192-1a - 50.d	34.5605	4.46395	0.129163	86.5816	0.391627	239.958	60.4571	4.25447	0.150962	0.780206	0.0352939	1360.9	43.5331	4885.38	64.5342	72.1435	M
266	YK192-1a - 30.d	45.6051	2.46567	0.0540655	87.8061	-0.0495062	227.817	115.351	3.86644	0.201789	0.79953	0.0615733	1482.86	69.1368	4920.26	109.691	69.8622	M
267	YK192-1a - 33.d	47.6827	1.3477	0.028264	87.9557	0.0135189	232.146	169.677	3.81899	0.281888	0.798716	0.0895892	1499.3	98.7473	4918.81	159.774	69.5191	M
268	YK192-1a - 61.d	7.83497	1.21635	0.155247	91.2097	0.588595	271.194	102.802	2.78719	0.155063	0.816457	0.0394274	1976.41	94.7049	4950.08	68.6908	60.0732	M
269	YK192-1a - 48.d	6.24015	0.729609	0.116922	92.4622	0.675368	338.532	270.017	2.38974	0.21909	0.808755	0.0900274	2253.46	174.394	4936.59	158.436	54.3518	M
270	YK192-1a - 60.d	5.26344	0.911701	0.173214	92.8671	-1.47714	145.91	141.85	2.26204	0.103501	0.87537	0.0440162	2359.94	90.4273	5048.97	71.215	53.259	M
271	YK192-1a - 46.d	3.78373	0.246744	0.0652119	95.3111	0.956978	407.391	278.617	1.48666	0.0976598	0.836551	0.0582169	3316.09	170.336	4984.64	98.8383	33.4739	M
272	YK192-1a - 7.d	1.5853	0.165117	0.104155	97.9423	-0.387714	-23.4062	2039.22	0.650281	0.0905055	0.922562	0.179363	6003.52	544.964	5123.22	274.482	-17.1827	M
273	YK192-1a - 15.d	459.281	112.37	0.244665	49.2312	1.24734	215.71	9.22728	16.0947	0.372535	0.444009	0.0173274	388.579	8.72851	4064.59	58.1178	90.4399	I
274	YK192-1a - 57.d	221.885	43.278	0.195047	53.6482	1.30704	223.968	20.5839	14.6941	0.512912	0.468623	0.0389036	424.424	14.3378	4144.75	123.049	89.76	I
275	YK192-1a - 14.d	540.715	127.862	0.236468	54.8344	2.9538	226.999	11.1878	14.318	0.329557	0.47416	0.019658	435.206	9.68648	4162.15	61.3881	89.5437	I
276	YK192-1a - 35.d	124.935	22.0393	0.176406	55.4746	-0.811381	199.61	28.027	14.1164	0.519548	0.5341	0.052909	441.212	15.6954	4337.54	145.242	89.8281	I
277	YK192-1a - 29.d	517.636	134.045	0.258957	56.7084	0.0862069	211.93	17.1937	13.7247	0.317908	0.521374	0.0313412	453.371	10.1408	4302.15	88.3071	89.4617	I
278	YK192-1a - 62.d	61.7741	11.6345	0.18834	61.8093	-0.678455	196.699	45.6851	12.1083	0.726129	0.59395	0.0740536	511.551	29.492	4492.61	181.299	88.6135	I
279	YK192-1a - 47.d	140.04	32.7746	0.234038	66.6685	3.56575	240.349	15.5279	10.5663	0.289044	0.571496	0.0206091	582.926	15.2465	4436.49	52.592	86.8607	I
280	YK192-1a - 58.d	261.625	66.2938	0.253392	72.8699	2.20979	245.234	26.9939	8.60049	0.235472	0.630577	0.0312262	709.073	18.3841	4579.43	71.6886	84.5161	I
281	YK192-1a - 24.d	328.391	119.51	0.363925	73.1155	2.54514	242.363	21.1122	8.52274	0.186423	0.636604	0.0241205	715.195	14.8073	4593.2	54.8133	84.4293	I
282	YK192-1a - 10.d	59.7593	8.42566	0.140993	73.5748	-1.01807	204.57	22.7439	8.37822	0.240567	0.685407	0.0253853	726.862	19.7371	4699.78	53.2993	84.5341	I
283	YK192-1a - 32.d	356.538	92.3549	0.259032	78.9359	2.26687	254.935	31.7599	6.67758	0.152016	0.686375	0.0289324	899.589	19.1146	4701.81	60.6552	80.8672	I
284	YK192-1a - 4.d	381.622	97.7406	0.256119	80.2213	3.38768	272.867	31.3768	6.26976	0.135396	0.684991	0.0268412	953.974	19.1493	4698.9	56.3926	79.6979	I
285	YK192-1a - 13.d	391.576	96.1573	0.245565	80.5658	1.89406	271.247	53.762	6.16063	0.192493	0.690484	0.0455827	969.663	28.1294	4710.39	94.9536	79.4144	I
286	YK192-1a - 66.d	241.986	62.0219	0.256304	80.7725	3.14215	285.206	41.3059	6.09474	0.148566	0.681059	0.034589	979.387	22.1487	4690.62	73.1196	79.1203	I
287	YK192-1a - 26.d	33.9575	12.1781	0.358628	81.3595	1.39736	323.167	147.415	5.9077	0.619861	0.657	0.118993	1008.09	97.9251	4638.77	261.421	78.2681	I
288	YK192-1a - 41.d	18.824	9.03564	0.480006	82.4985	0.73403	254.214	86.8514	5.54844	0.289349	0.726522	0.0663193	1068.24	51.3382	4783.44	130.841	77.6681	I
289	YK192-1a - 56.d	10.7269	3.33163	0.310587	90.5994	0.170756	262.836	282.719	2.9807	0.254975	0.812709	0.117126	1864.94	138.549	4943.53	205.059	62.2751	I
290	YK192-1a - 54.d	109.747	225.49	2.05464	92.332	1.22307	310.681	105.029	2.43121	0.0592992	0.816318	0.0355285	2220.95	45.8253	4949.84	61.9094	55.1309	I
291	YK192-1a - 36.d	115.227	218.56	1.89677	92.4246	0.659504	300.628	162.192	2.40194	0.0795677	0.820954	0.0543315	2243.8	62.7741	4957.89	94.1057	54.7429	I
292	YK192-1a - 21.d	119.155	189.402	1.58954	93.0192	0.858938	336.999	200.264	2.21324	0.08536	0.817485	0.0620507	2403.37	77.379	4951.87	107.961	51.4654	I
293	YK192-1a - 68.d	0.774836	0.027957	0.0360812	98.8631	-0.158442	339.897	1936.47	0.358788	0.0354347	0.903654	0.0975531	8584.16	469.38	5093.96	152.599	-68.5163	I
Leucogranite YK192-1b
294	YK192-1b - 73.d	348.745	41.937	0.120251	46.1924	2.90934	226.456	11.3902	15.542	0.383534	0.437174	0.0214461	401.976	9.61672	4041.47	73.158	90.0537	M
295	YK192-1b - 40.d	344.046	83.3691	0.24232	46.3231	0.366008	212.143	10.1318	15.5051	0.376236	0.469139	0.0187541	402.903	9.4773	4146.38	59.2467	90.283	M
296	YK192-1b - 65.d	293.898	183.769	0.625283	69.3006	0.687391	230.265	43.5031	8.86737	0.321078	0.640048	0.0525916	688.832	23.6556	4601	118.824	85.0287	M
297	YK192-1b - 13.d	50.2595	1.35939	0.0270475	75.8208	-0.751454	206.554	32.1597	6.98478	0.216152	0.722586	0.0303954	862.554	24.9842	4775.65	60.3155	81.9385	M
298	YK192-1b - 1.d	54.7587	6.42704	0.11737	77.0292	1.13152	241.913	40.2371	6.63478	0.247131	0.699909	0.0361203	905.003	31.4504	4729.88	74.1596	80.8663	M
299	YK192-1b - 55.d	111.171	83.3021	0.749314	81.1821	0.958289	248.968	54.8011	5.4352	0.179604	0.734453	0.0409136	1088.71	33.1024	4799	79.7881	77.3138	M
300	YK192-1b - 36.d	54.0886	54.9501	1.01593	83.1395	0.477706	241.625	69.5387	4.87005	0.188312	0.758777	0.0466098	1203.92	42.4646	4845.62	87.792	75.1544	M
301	YK192-1b - 23.d	66.6034	4.64373	0.0697222	83.1689	0.259582	251.355	202.336	4.86133	0.434515	0.75248	0.136174	1205.89	98.3115	4833.7	258.779	75.0524	M
302	YK192-1b - 38.d	138.23	36.5191	0.264191	83.1916	0.522241	243.198	69.372	4.85496	0.1705	0.758216	0.0464272	1207.34	38.6668	4844.56	87.5172	75.0785	M
303	YK192-1b - 45.d	84.5464	86.5035	1.02315	84.3967	0.483569	263.871	153.429	4.50649	0.292922	0.756882	0.0958077	1291.92	76.0988	4842.04	180.941	73.3187	M
304	YK192-1b - 29.d	39.2649	3.01513	0.0767896	90.3919	0.532579	265.746	92.2168	2.77514	0.0804484	0.819016	0.0354163	1983.79	49.5022	4954.53	61.4976	59.96	M
305	YK192-1b - 54.d	156.226	73.6949	0.471721	90.7264	0.212455	251.23	81.2195	2.67869	0.0725284	0.827964	0.0300043	2044.99	47.4479	4969.98	51.5018	58.8532	M
306	YK192-1b - 35.d	57.5115	75.0956	1.30575	91.9365	0.0115816	249.848	229.327	2.32924	0.122185	0.840485	0.0742031	2302.68	101.581	4991.3	125.353	53.8662	M
307	YK192-1b - 34.d	34.559	3.29233	0.0952668	92.33	-0.0493841	215.221	1444.44	2.21585	0.615105	0.855049	0.443888	2401	557.844	5015.68	736.309	52.1301	M
308	YK192-1b - 67.d	27.5952	27.9988	1.01463	93.1089	0.128057	265.724	150.016	1.9905	0.0629233	0.847716	0.0414437	2624.05	68.146	5003.46	69.3774	47.5554	M
309	YK192-1b - 3.d	20.9668	13.8436	0.660263	94.4648	0.0576084	281.788	444.104	1.59882	0.114023	0.858452	0.0990575	3131.61	176.947	5021.31	163.622	37.6336	M
310	YK192-1b - 57.d	30.5924	3.00281	0.0981556	95.2637	-0.0509861	231.15	1920.54	1.36838	0.318771	0.877053	0.365222	3536.37	636.131	5051.69	589.699	29.9963	M
311	YK192-1b - 44.d	2.60091	1.31576	0.505883	96.1934	-0.502587	185.032	455.01	1.09993	0.066101	0.892613	0.0691309	4168.63	184.534	5076.58	109.558	17.885	M
312	YK192-1b - 70.d	14.9081	6.1202	0.410529	97.1984	-0.101833	240.142	1821.03	0.809513	0.109539	0.893785	0.205075	5185.37	482.962	5078.43	324.55	-2.10562	M
313	YK192-1b - 31.d	1.74577	0.117319	0.0672017	98.0326	-0.643913	158.276	718.948	0.568519	0.0343863	0.908188	0.0562655	6542.16	248.705	5101.04	87.5486	-28.2516	M
314	YK192-1b - 25.d	2.11665	0.308945	0.145959	98.1541	-2.03342	-665.885	1121.07	0.529968	0.0342177	0.966526	0.0741349	6834.39	272.204	5188.85	107.993	-31.713	M
315	YK192-1b - 52.d	2.43416	0.307911	0.126496	98.6858	-0.363683	162.167	1756.85	0.379717	0.0295543	0.912073	0.0920082	8317.22	364.041	5107.07	142.518	-62.857	M
316	YK192-1b - 32.d	3.55263	0.443627	0.124873	98.7323	-0.495281	-37.2585	2175.92	0.365958	0.0278551	0.922346	0.107493	8490.52	359.587	5122.89	164.539	-65.7372	M
317	YK192-1b - 26.d	1.88011	0.154493	0.0821721	98.8469	-1.08151	-752.947	2540.99	0.329915	0.0265941	0.952724	0.103543	8986.53	391.211	5168.59	153.146	-73.868	M
318	YK192-1b - 51.d	1.65677	0.0774428	0.0467432	98.8645	-0.318942	167.756	2241.06	0.328054	0.0274172	0.912966	0.101474	9013.96	406.213	5108.45	157.018	-76.452	M
319	YK192-1b - 42.d	437.609	143.452	0.327808	44.8452	3.11192	224.717	9.67871	15.9312	0.390605	0.428921	0.0176308	392.448	9.33508	4013.02	61.4061	90.2206	I
320	YK192-1b - 8.d	333.814	55.9381	0.167573	45.8932	2.32762	221.846	10.1912	15.6287	0.366753	0.444489	0.0190147	399.814	9.09726	4066.2	63.702	90.1674	I
321	YK192-1b - 27.d	305.063	40.3273	0.132193	47.2934	3.34712	225.298	9.19494	15.224	0.359276	0.449512	0.0158617	410.11	9.37686	4082.93	52.4928	89.9555	I
322	YK192-1b - 64.d	471.937	177.675	0.37648	57.2317	0.144086	213.95	26.6149	12.3541	0.403468	0.55777	0.0440111	501.761	15.7654	4401.01	115.293	88.599	I
323	YK192-1b - 41.d	267.885	122.696	0.458018	58.1362	0.803031	222.308	25.3056	12.0924	0.396124	0.551419	0.0406888	512.198	16.1294	4384.27	107.914	88.3173	I
324	YK192-1b - 71.d	286.194	178.155	0.622498	59.6447	1.6461	236.695	29.7161	11.656	0.462858	0.541429	0.0457194	530.607	20.2266	4357.51	123.672	87.8232	I
325	YK192-1b - 10.d	179.69	19.3327	0.107589	60.4984	1.26413	223.083	16.5926	11.4101	0.303738	0.571018	0.0244892	541.576	13.8279	4435.27	62.5501	87.7893	I
326	YK192-1b - 18.d	291.536	112.881	0.387194	60.8867	0.341864	223.12	60.4271	11.2979	0.702889	0.574394	0.0923336	546.73	32.6121	4443.87	234.345	87.697	I
327	YK192-1b - 33.d	305.068	245.096	0.803413	60.9281	0.965933	227.043	29.6307	11.2858	0.402709	0.568614	0.0446852	547.294	18.7231	4429.12	114.654	87.6433	I
328	YK192-1b - 12.d	214.968	40.1967	0.186989	63.7992	0.196771	220.184	67.351	10.4568	0.709882	0.604426	0.0953928	588.758	38.1988	4518.02	229.193	86.9687	I
329	YK192-1b - 49.d	281.992	186.355	0.660852	64.2516	2.01919	231.741	18.1118	10.3256	0.243734	0.591808	0.0246995	595.902	13.4356	4487.36	60.7049	86.7204	I
330	YK192-1b - 60.d	87.8358	9.43565	0.107424	70.5282	0.510621	234.165	71.9745	8.51266	0.529758	0.646651	0.0834462	715.998	42.173	4615.84	186.472	84.4882	I
331	YK192-1b - 15.d	244.644	272.312	1.1131	77.1761	0.859026	233.392	32.6761	6.59261	0.149822	0.709127	0.029422	910.402	19.295	4748.68	59.5684	80.8283	I
332	YK192-1b - 20.d	57.1724	1.47155	0.0257389	77.5952	-0.370064	207.545	66.1425	6.47221	0.291491	0.736219	0.0587116	926.177	38.855	4802.44	114.204	80.7145	I
333	YK192-1b - 39.d	207.053	209.5	1.01182	81.4456	0.887612	239.509	37.2501	5.35931	0.124208	0.744108	0.0273004	1102.88	23.4936	4817.7	52.5034	77.1077	I
334	YK192-1b - 72.d	204.408	281.236	1.37586	81.6756	0.379234	237.333	73.8759	5.29293	0.193115	0.747896	0.0539425	1115.58	37.3757	4824.96	103.18	76.8789	I
335	YK192-1b - 47.d	190.717	223.266	1.17066	82.1787	0.225136	239.847	141.668	5.14758	0.338158	0.750835	0.100816	1144.44	68.8886	4830.57	192.035	76.3083	I
336	YK192-1b - 69.d	143.147	137.031	0.95727	84.0288	0.119686	234.713	141.139	4.61334	0.274245	0.771738	0.090069	1264.75	68.271	4869.81	166.615	74.0288	I
337	YK192-1b - 19.d	50.2085	5.76482	0.114818	84.3236	-0.858997	188.45	89.3275	4.52894	0.215686	0.803533	0.0556211	1286.11	55.528	4927.37	98.5624	73.8986	I
338	YK192-1b - 11.d	168.432	165.904	0.984989	85.2559	0.22026	247.06	171.695	4.25869	0.281969	0.775857	0.101321	1359.68	81.1687	4877.41	186.369	72.1229	I
339	YK192-1b - 62.d	127.355	227.069	1.78296	87.3402	0.167169	242.868	127.65	3.65677	0.159478	0.798435	0.0646707	1558.37	60.3739	4918.31	115.377	68.315	I
340	YK192-1b - 6.d	95.9116	22.0929	0.230347	88.8057	0.82043	264.541	70.0528	3.23322	0.0714926	0.802808	0.0313082	1737.21	33.6726	4926.09	55.5324	64.7345	I
341	YK192-1b - 14.d	182.99	137.17	0.749603	88.8664	0.741759	314.029	209.773	3.21491	0.19135	0.781226	0.0941195	1745.88	91.037	4887.25	171.857	64.2769	I
342	YK192-1b - 28.d	133.023	239.565	1.80094	88.9469	1.29601	281.311	69.7473	3.1922	0.0798507	0.796828	0.0307761	1756.75	38.4654	4915.44	55.0247	64.2606	I
343	YK192-1b - 9.d	38.7735	49.2654	1.27059	90.5138	0.726957	291.96	138.194	2.73961	0.108868	0.810283	0.0526675	2005.9	68.5044	4939.28	92.5017	59.3888	I
344	YK192-1b - 30.d	161.909	96.3379	0.595014	90.7366	-0.544193	218.659	89.0103	2.67608	0.0641787	0.840178	0.0328288	2046.7	42.0564	4990.78	55.4799	58.9904	I
345	YK192-1b - 61.d	89.5223	35.8309	0.400246	92.4993	-0.0821016	246.992	119.916	2.16672	0.0522956	0.846929	0.0359617	2446.29	49.1336	5002.14	60.2599	51.0951	I
346	YK192-1b - 16.d	113.316	91.2123	0.804936	95.2141	-0.08835	271.355	178.835	1.3825	0.0303073	0.868861	0.0342997	3508.5	59.3168	5038.4	55.9356	30.3648	I
347	YK192-1b - 68.d	88.1899	245.092	2.77914	95.3253	0.972535	401.828	247.969	1.34951	0.0484277	0.845357	0.0470934	3574.31	98.4672	4999.5	79.0687	28.5068	I
348	YK192-1b - 21.d	42.4787	124.106	2.9216	95.9832	0.635641	411.647	370.148	1.15961	0.0559593	0.854321	0.0605403	4008.66	144.07	5014.47	100.513	20.0582	I
349	YK192-1b - 22.d	68.6674	186.377	2.7142	96.0054	1.03515	417.124	237.371	1.15316	0.0302475	0.853795	0.0385417	4025.35	78.5354	5013.6	64.0316	19.7113	I
350	YK192-1b - 50.d	82.0951	291.882	3.55541	96.163	0.409243	367.463	339.971	1.108	0.0374792	0.864179	0.0529182	4146.22	103.451	5030.74	86.7949	17.5822	I
351	YK192-1b - 17.d	10.7475	0.820299	0.0763248	96.3648	-0.342002	111.041	1134.01	1.05048	0.1148	0.90458	0.163508	4311.53	343.897	5095.41	255.492	15.384	I
352	YK192-1b - 43.d	54.301	155.648	2.8664	96.6254	0.0362453	315.017	240.601	0.974768	0.0242743	0.878137	0.0326538	4551.21	81.2963	5053.44	52.6548	9.93828	I
353	YK192-1b - 24.d	11.6788	0.43902	0.0375913	96.6769	-0.0770988	279.307	858.441	0.96003	0.0940913	0.883575	0.115019	4601.13	322.613	5062.18	184.259	9.10767	I
354	YK192-1b - 5.d	9.3636	0.543077	0.0579988	97.0348	0.0903575	375.9	1115.68	0.856338	0.0857376	0.875953	0.134605	4987.56	348.024	5049.91	217.627	1.23462	I
Note: Group I-Core (Igneous); Group M-Rim (Metamorphic); Group P-either core or rim with high U/Pb ratio and interpreted to have experienced partial Pb loss. The common Pb value to calculate the 207Pb-corrected ages is 0.9205.
Complilation of results for U-Pb reference materials
Summary
Standard	Age (Ma)	± 2σ	MSWD	p	n
BLR-1	1042	5	1.6	0.06	20 of 20
Published age	1047.1	0.4	Aleinikoff et al. (2007)
Individual Data
Spot	U (ppm)	Th (ppm)	Th/U	238U/206Pb	± 2σ	207Pb/206Pb			± 2σ	206Pb/238U Age (Ma)	± 2σ	207Pb/206Pb Age (Ma)	± 2σ	Disc. (%)
Blr - 1.d	272.566	155.255	0.569604	5.57532	0.119201	0.0883368			0.00428001	1063.49	20.9611	1388.96	92.9975	23.4326
Blr - 2.d	273.967	156.569	0.571488	5.6473	0.117677	0.0913468			0.00481372	1050.98	20.2081	1452.99	100.267	27.6676
Blr - 3.d	275.33	157.281	0.571244	5.56873	0.120567	0.0902726			0.00366993	1064.65	21.2477	1430.45	77.5891	25.5723
Blr - 4.d	270.826	154.698	0.571207	5.61094	0.123198	0.0914179			0.00452283	1057.26	21.4104	1454.47	94.1156	27.3094
Blr - 5.d	284.377	161.243	0.567005	5.68201	0.123873	0.0907965			0.00394779	1045.05	21.0324	1441.48	82.8574	27.5015
Blr - 6.d	273.233	156.799	0.573867	5.69323	0.123285	0.0913176			0.0044115	1043.15	20.8563	1452.38	91.9257	28.1763
Blr - 7.d	275.532	158.292	0.574495	5.5776	0.121459	0.089279			0.00417993	1063.09	21.3421	1409.29	89.6137	24.5658
Blr - 8.d	283.853	160.356	0.564926	5.58571	0.119319	0.0904544			0.00409029	1061.66	20.9098	1434.28	86.2573	25.9796
Blr - 9.d	281.605	159.89	0.56778	5.48661	0.122663	0.0911823			0.00404783	1079.32	22.2184	1449.56	84.505	25.5414
Blr - 10.d	279.493	159.126	0.569337	5.44039	0.121005	0.0887331			0.00450913	1087.76	22.2628	1397.54	97.4231	22.1664
Blr - 11.d	304.064	167.175	0.549803	5.54162	0.118922	0.0885087			0.00416478	1069.45	21.1476	1392.69	90.2716	23.2098
Blr - 12.d	290.363	159.289	0.548584	5.61765	0.123653	0.0880844			0.0046365	1056.1	21.4421	1383.46	101.109	23.6629
Blr - 13.d	277.686	156.224	0.562593	5.65181	0.13403	0.0893482			0.00464275	1050.21	22.9824	1410.78	99.4388	25.5583
Blr - 14.d	277.263	154.902	0.558684	5.61892	0.125009	0.0897431			0.00394935	1055.88	21.6681	1419.21	84.1182	25.601
Blr - 15.d	289.457	161.283	0.557192	5.77617	0.127274	0.0913923			0.00477067	1029.31	20.9621	1453.93	99.3077	29.2054
Blr - 16.d	279.697	154.666	0.552979	5.5431	0.123508	0.0889782			0.00443942	1069.18	21.9522	1402.83	95.5833	23.7837
Blr - 17.d	287.289	157.051	0.546667	5.63303	0.126098	0.0909206			0.00463938	1053.44	21.7557	1444.08	97.2056	27.0516
Blr - 18.d	298.548	165.093	0.552986	5.5481	0.120426	0.0892101			0.00436964	1068.3	21.3689	1407.81	93.7721	24.1167
Blr - 19.d	298.77	165.517	0.553997	5.61189	0.127225	0.0899383			0.00410011	1057.1	22.1034	1423.36	87.0903	25.7324
Blr - 20.d	290.762	160.148	0.550785	5.54098	0.123601	0.0877606			0.00451661	1069.56	21.9844	1376.38	98.9543	22.2919
